# Supplementary material
Source: MDPI journal article supplement (https://www.mdpi.com/2072-4292/12/16/2520)
Supplement: s1 [file s1]

1  
2

Supplements

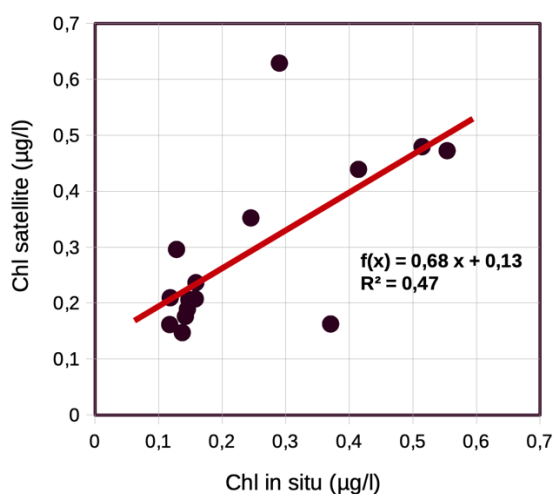

3  
4  
5

**Figure S1:** Correlation between *in situ* Chl from the MOANA MATY cruise and satellite Chl. The linear regression is in red.

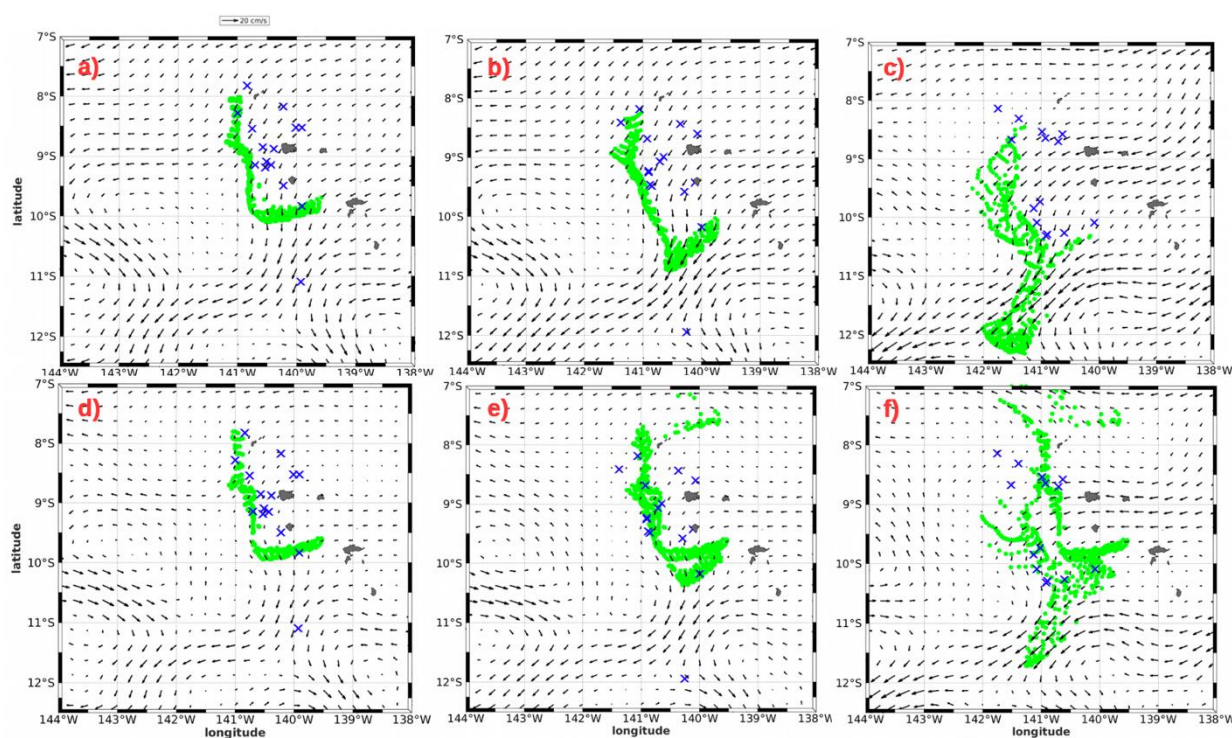

6  
7  
8  
9  
10  
11  
12  
13

**Figure S2:** Comparison of the dispersion of SVP drifters deployed during the MOANA-MATY cruise (blue crosses) and the simulated particles (green dots). Considering the total surface current, from the GEKCO product, as the sum of the geostrophic component and the Ekman component, two simulations are run, with (a-c) 100% and (d-f) 50% of the Ekman component. 549 particles are released in the 100% simulation and 369 particles in the 50% simulation. Particles are released daily between the 1<sup>st</sup> and 10<sup>th</sup> of October 2018 and their positions as well as those of the SVP drifters are shown the 15<sup>th</sup> October (left column), 25<sup>th</sup> October (center column) and 5<sup>th</sup> November (right column) 2018.

14 **Table S1:** Average distances (km) of the simulated particles (Figure S2) from their barycenter.  
 15 Considering the total surface current, from the GEKCO product, as the sum of the geostrophic  
 16 component and the ekman component, two simulations are run, with 100% and 50% of the ekman  
 17 component. 549 particles are released in the 100% simulation and 369 particles in the 50% simulation.  
 18 The average distances are presented for the 15<sup>th</sup> and 20<sup>th</sup> of October 2018 and 5<sup>th</sup> of November 2018.  
 19 Average distances (km) of surface velocity profilers (SVP), deployed during the MOANA-MATY  
 20 cruise, from their barycenter are also presented for the same days.

|       | 15 <sup>th</sup> October | 25 <sup>th</sup> October | 5 <sup>th</sup> November |
|-------|--------------------------|--------------------------|--------------------------|
| 100 % | 56.60                    | 204.81                   | 339.30                   |
| 50 %  | 28.98                    | 95.48                    | 171.52                   |
| SVP   | 34.06                    | 67.49                    | 179.36                   |

21

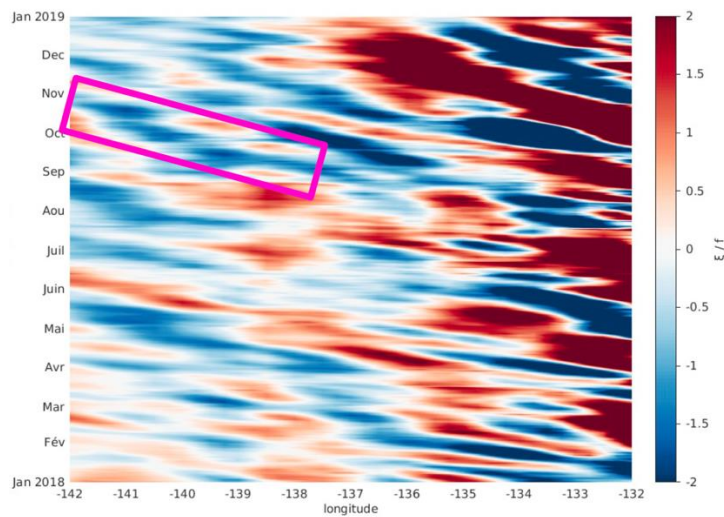

22

23 **Figure S3:** Hovmoller diagram of the vorticity normalized by the Coriolis parameter on latitude 10.3°S  
 24 during the 1<sup>st</sup> January 2018 until the 1<sup>st</sup> January 2019. The pink box highlights the time-longitude  
 25 evolution of the eddy detected the 3<sup>rd</sup> October 2018.

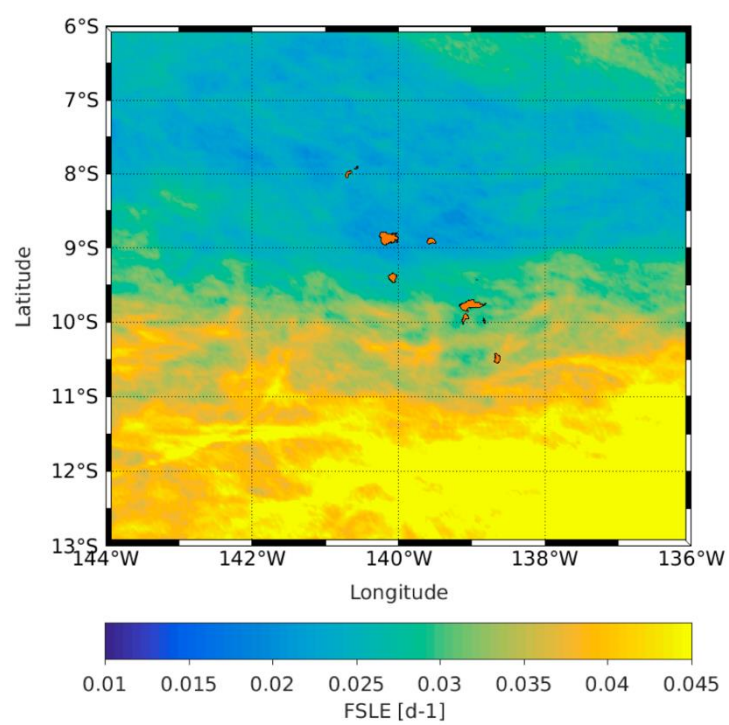

26

27

**Figure S4:** Average of FSLEs (d<sup>-1</sup>) for the year 2018 in the Marquesas archipelago.
